# Supplementary material for: Contribution of portable obstetric ultrasound service innovation in averting maternal and neonatal morbidities and mortalities at semi-urban health centers of Ethiopia: a retrospective facility-based study
Source: Springer Nature journal article supplement (doi:10.1186/s12884-022-04703-1), 2022-04-28
Supplement: MOESM1 [file 20353770]

### ULTRASOUND SCAN LOG

| REGION | ZONE | WOREDA | S.N | Date | Medical Record No. (MRN) | Patient Telephone No. | Patient Knows LMP?                                          | GA given by LMP | GA Estimated on Ultrasound | GA by CRL | GA by BPD | GA by HC | GA by AC | GA by FL | Is this her first scan in this pregnancy? |                                                                                                   |
|--------|------|--------|-----|------|--------------------------|-----------------------|-------------------------------------------------------------|-----------------|----------------------------|-----------|-----------|----------|----------|----------|-------------------------------------------|---------------------------------------------------------------------------------------------------|
|        |      |        |     |      |                          |                       | <input type="checkbox"/> Yes<br><input type="checkbox"/> No |                 |                            |           |           |          |          |          |                                           | <input type="checkbox"/> Yes<br><input type="checkbox"/> No<br>Write number of prior scans: _____ |
|        |      |        |     |      |                          |                       | <input type="checkbox"/> Yes<br><input type="checkbox"/> No |                 |                            |           |           |          |          |          |                                           | <input type="checkbox"/> Yes<br><input type="checkbox"/> No<br>Write number of prior scans: _____ |
|        |      |        |     |      |                          |                       | <input type="checkbox"/> Yes<br><input type="checkbox"/> No |                 |                            |           |           |          |          |          |                                           | <input type="checkbox"/> Yes<br><input type="checkbox"/> No<br>Write number of prior scans: _____ |
|        |      |        |     |      |                          |                       | <input type="checkbox"/> Yes<br><input type="checkbox"/> No |                 |                            |           |           |          |          |          |                                           | <input type="checkbox"/> Yes<br><input type="checkbox"/> No<br>Write number of prior scans: _____ |
|        |      |        |     |      |                          |                       | <input type="checkbox"/> Yes<br><input type="checkbox"/> No |                 |                            |           |           |          |          |          |                                           | <input type="checkbox"/> Yes<br><input type="checkbox"/> No<br>Write number of prior scans: _____ |
|        |      |        |     |      |                          |                       | <input type="checkbox"/> Yes<br><input type="checkbox"/> No |                 |                            |           |           |          |          |          |                                           | <input type="checkbox"/> Yes<br><input type="checkbox"/> No<br>Write number of prior scans: _____ |
|        |      |        |     |      |                          |                       | <input type="checkbox"/> Yes<br><input type="checkbox"/> No |                 |                            |           |           |          |          |          |                                           | <input type="checkbox"/> Yes<br><input type="checkbox"/> No<br>Write number of prior scans: _____ |
|        |      |        |     |      |                          |                       | <input type="checkbox"/> Yes<br><input type="checkbox"/> No |                 |                            |           |           |          |          |          |                                           | <input type="checkbox"/> Yes<br><input type="checkbox"/> No<br>Write number of prior scans: _____ |
|        |      |        |     |      |                          |                       | <input type="checkbox"/> Yes<br><input type="checkbox"/> No |                 |                            |           |           |          |          |          |                                           | <input type="checkbox"/> Yes<br><input type="checkbox"/> No<br>Write number of prior scans: _____ |

## ULTRASOUND SCAN LOG

HEALTH FACILITY \_\_\_\_\_

INSTRUCTION: TICK ( ✓ ) ALL THAT IS APPLICABLE

| Her Current Trimester                                                                                                                                                                                                                           | Indication for Scanning                                                                                                                                                 | Ultrasound Diagnosis                                                                                                                                                                                                                |                                                                                                                                                                                                                                                                                                              | Action                                                                                                                                                                                                                                                              | Reason for Referral                                                                                                                                                                                                                                        | Outcomes                                                                                                                                                                                                                                                                                                                                                               |
|-------------------------------------------------------------------------------------------------------------------------------------------------------------------------------------------------------------------------------------------------|-------------------------------------------------------------------------------------------------------------------------------------------------------------------------|-------------------------------------------------------------------------------------------------------------------------------------------------------------------------------------------------------------------------------------|--------------------------------------------------------------------------------------------------------------------------------------------------------------------------------------------------------------------------------------------------------------------------------------------------------------|---------------------------------------------------------------------------------------------------------------------------------------------------------------------------------------------------------------------------------------------------------------------|------------------------------------------------------------------------------------------------------------------------------------------------------------------------------------------------------------------------------------------------------------|------------------------------------------------------------------------------------------------------------------------------------------------------------------------------------------------------------------------------------------------------------------------------------------------------------------------------------------------------------------------|
| <input type="checkbox"/> 1 <sup>st</sup> Trimester<br><input type="checkbox"/> 2 <sup>nd</sup> Trimester<br><input type="checkbox"/> 3 <sup>rd</sup> Trimester<br><input type="checkbox"/> Pelvic Scan<br><input type="checkbox"/> Others _____ | <input type="checkbox"/> Routine<br><input type="checkbox"/> High Risk pregnancy<br><input type="checkbox"/> Trauma /Emergency<br><input type="checkbox"/> Other: _____ | <input type="checkbox"/> Normal<br><input type="checkbox"/> Breech<br><input type="checkbox"/> Low-lying<br><input type="checkbox"/> previa<br><input type="checkbox"/> Multiple gestation<br><input type="checkbox"/> Small for GA | <input type="checkbox"/> Abnormal fluid<br><input type="checkbox"/> IUFD/Fetal demise<br><input type="checkbox"/> Gross anomaly<br><input type="checkbox"/> Risk of abortion<br><input type="checkbox"/> Large for GA<br><input type="checkbox"/> Pelvic Pathology<br><input type="checkbox"/> Others: _____ | <input type="checkbox"/> Referred<br><input type="checkbox"/> Managed in facility<br><input type="checkbox"/> Follow-up<br><input type="checkbox"/> No Action<br><input type="checkbox"/> Appointment given (date) _____<br><input type="checkbox"/> Follow-up call | <input type="checkbox"/> Unsure of findings<br><input type="checkbox"/> Due to Detected diagnosis<br><input type="checkbox"/> Facility limitation to handle<br><input type="checkbox"/> Patient Preference<br><input type="checkbox"/> Other reasons _____ | <input type="checkbox"/> Normal Vaginal Delivery<br><input type="checkbox"/> Caesarean section<br><input type="checkbox"/> Preterm/small baby<br><input type="checkbox"/> MVA<br><input type="checkbox"/> Fresh/Macerated still born<br><input type="checkbox"/> Confirm Diagnosis<br><input type="checkbox"/> Higher referral<br><input type="checkbox"/> Other _____ |
| <input type="checkbox"/> 1 <sup>st</sup> Trimester<br><input type="checkbox"/> 2 <sup>nd</sup> Trimester<br><input type="checkbox"/> 3 <sup>rd</sup> Trimester<br><input type="checkbox"/> Pelvic Scan<br><input type="checkbox"/> Others _____ | <input type="checkbox"/> Routine<br><input type="checkbox"/> High Risk pregnancy<br><input type="checkbox"/> Trauma /Emergency<br><input type="checkbox"/> Other: _____ | <input type="checkbox"/> Normal<br><input type="checkbox"/> Breech<br><input type="checkbox"/> Low-lying<br><input type="checkbox"/> previa<br><input type="checkbox"/> Multiple gestation<br><input type="checkbox"/> Small for GA | <input type="checkbox"/> Abnormal fluid<br><input type="checkbox"/> IUFD/Fetal demise<br><input type="checkbox"/> Gross anomaly<br><input type="checkbox"/> Risk of abortion<br><input type="checkbox"/> Large for GA<br><input type="checkbox"/> Pelvic Pathology<br><input type="checkbox"/> Others: _____ | <input type="checkbox"/> Referred<br><input type="checkbox"/> Managed in facility<br><input type="checkbox"/> Follow-up<br><input type="checkbox"/> No Action<br><input type="checkbox"/> Appointment given (date) _____<br><input type="checkbox"/> Follow-up call | <input type="checkbox"/> Unsure of findings<br><input type="checkbox"/> Due to Detected diagnosis<br><input type="checkbox"/> Facility limitation to handle<br><input type="checkbox"/> Patient Preference<br><input type="checkbox"/> Other reasons _____ | <input type="checkbox"/> Normal Vaginal Delivery<br><input type="checkbox"/> Caesarean section<br><input type="checkbox"/> Preterm/small baby<br><input type="checkbox"/> MVA<br><input type="checkbox"/> Fresh/Macerated still born<br><input type="checkbox"/> Confirm Diagnosis<br><input type="checkbox"/> Higher referral<br><input type="checkbox"/> Other _____ |
| <input type="checkbox"/> 1 <sup>st</sup> Trimester<br><input type="checkbox"/> 2 <sup>nd</sup> Trimester<br><input type="checkbox"/> 3 <sup>rd</sup> Trimester<br><input type="checkbox"/> Pelvic Scan<br><input type="checkbox"/> Others _____ | <input type="checkbox"/> Routine<br><input type="checkbox"/> High Risk pregnancy<br><input type="checkbox"/> Trauma /Emergency<br><input type="checkbox"/> Other: _____ | <input type="checkbox"/> Normal<br><input type="checkbox"/> Breech<br><input type="checkbox"/> Low-lying<br><input type="checkbox"/> previa<br><input type="checkbox"/> Multiple gestation<br><input type="checkbox"/> Small for GA | <input type="checkbox"/> Abnormal fluid<br><input type="checkbox"/> IUFD/Fetal demise<br><input type="checkbox"/> Gross anomaly<br><input type="checkbox"/> Risk of abortion<br><input type="checkbox"/> Large for GA<br><input type="checkbox"/> Pelvic Pathology<br><input type="checkbox"/> Others: _____ | <input type="checkbox"/> Referred<br><input type="checkbox"/> Managed in facility<br><input type="checkbox"/> Follow-up<br><input type="checkbox"/> No Action<br><input type="checkbox"/> Appointment given (date) _____<br><input type="checkbox"/> Follow-up call | <input type="checkbox"/> Unsure of findings<br><input type="checkbox"/> Due to Detected diagnosis<br><input type="checkbox"/> Facility limitation to handle<br><input type="checkbox"/> Patient Preference<br><input type="checkbox"/> Other reasons _____ | <input type="checkbox"/> Normal Vaginal Delivery<br><input type="checkbox"/> Caesarean section<br><input type="checkbox"/> Preterm/small baby<br><input type="checkbox"/> MVA<br><input type="checkbox"/> Fresh/Macerated still born<br><input type="checkbox"/> Confirm Diagnosis<br><input type="checkbox"/> Higher referral<br><input type="checkbox"/> Other _____ |
| <input type="checkbox"/> 1 <sup>st</sup> Trimester<br><input type="checkbox"/> 2 <sup>nd</sup> Trimester<br><input type="checkbox"/> 3 <sup>rd</sup> Trimester<br><input type="checkbox"/> Pelvic Scan<br><input type="checkbox"/> Others _____ | <input type="checkbox"/> Routine<br><input type="checkbox"/> High Risk pregnancy<br><input type="checkbox"/> Trauma /Emergency<br><input type="checkbox"/> Other: _____ | <input type="checkbox"/> Normal<br><input type="checkbox"/> Breech<br><input type="checkbox"/> Low-lying<br><input type="checkbox"/> previa<br><input type="checkbox"/> Multiple gestation<br><input type="checkbox"/> Small for GA | <input type="checkbox"/> Abnormal fluid<br><input type="checkbox"/> IUFD/Fetal demise<br><input type="checkbox"/> Gross anomaly<br><input type="checkbox"/> Risk of abortion<br><input type="checkbox"/> Large for GA<br><input type="checkbox"/> Pelvic Pathology<br><input type="checkbox"/> Others: _____ | <input type="checkbox"/> Referred<br><input type="checkbox"/> Managed in facility<br><input type="checkbox"/> Follow-up<br><input type="checkbox"/> No Action<br><input type="checkbox"/> Appointment given (date) _____<br><input type="checkbox"/> Follow-up call | <input type="checkbox"/> Unsure of findings<br><input type="checkbox"/> Due to Detected diagnosis<br><input type="checkbox"/> Facility limitation to handle<br><input type="checkbox"/> Patient Preference<br><input type="checkbox"/> Other reasons _____ | <input type="checkbox"/> Normal Vaginal Delivery<br><input type="checkbox"/> Caesarean section<br><input type="checkbox"/> Preterm/small baby<br><input type="checkbox"/> MVA<br><input type="checkbox"/> Fresh/Macerated still born<br><input type="checkbox"/> Confirm Diagnosis<br><input type="checkbox"/> Higher referral<br><input type="checkbox"/> Other _____ |
| <input type="checkbox"/> 1 <sup>st</sup> Trimester<br><input type="checkbox"/> 2 <sup>nd</sup> Trimester<br><input type="checkbox"/> 3 <sup>rd</sup> Trimester<br><input type="checkbox"/> Pelvic Scan<br><input type="checkbox"/> Others _____ | <input type="checkbox"/> Routine<br><input type="checkbox"/> High Risk pregnancy<br><input type="checkbox"/> Trauma /Emergency<br><input type="checkbox"/> Other: _____ | <input type="checkbox"/> Normal<br><input type="checkbox"/> Breech<br><input type="checkbox"/> Low-lying<br><input type="checkbox"/> previa<br><input type="checkbox"/> Multiple gestation<br><input type="checkbox"/> Small for GA | <input type="checkbox"/> Abnormal fluid<br><input type="checkbox"/> IUFD/Fetal demise<br><input type="checkbox"/> Gross anomaly<br><input type="checkbox"/> Risk of abortion<br><input type="checkbox"/> Large for GA<br><input type="checkbox"/> Pelvic Pathology<br><input type="checkbox"/> Others: _____ | <input type="checkbox"/> Referred<br><input type="checkbox"/> Managed in facility<br><input type="checkbox"/> Follow-up<br><input type="checkbox"/> No Action<br><input type="checkbox"/> Appointment given (date) _____<br><input type="checkbox"/> Follow-up call | <input type="checkbox"/> Unsure of findings<br><input type="checkbox"/> Due to Detected diagnosis<br><input type="checkbox"/> Facility limitation to handle<br><input type="checkbox"/> Patient Preference<br><input type="checkbox"/> Other reasons _____ | <input type="checkbox"/> Normal Vaginal Delivery<br><input type="checkbox"/> Caesarean section<br><input type="checkbox"/> Preterm/small baby<br><input type="checkbox"/> MVA<br><input type="checkbox"/> Fresh/Macerated still born<br><input type="checkbox"/> Confirm Diagnosis<br><input type="checkbox"/> Higher referral<br><input type="checkbox"/> Other _____ |
| <input type="checkbox"/> 1 <sup>st</sup> Trimester<br><input type="checkbox"/> 2 <sup>nd</sup> Trimester<br><input type="checkbox"/> 3 <sup>rd</sup> Trimester<br><input type="checkbox"/> Pelvic Scan<br><input type="checkbox"/> Others _____ | <input type="checkbox"/> Routine<br><input type="checkbox"/> High Risk pregnancy<br><input type="checkbox"/> Trauma /Emergency<br><input type="checkbox"/> Other: _____ | <input type="checkbox"/> Normal<br><input type="checkbox"/> Breech<br><input type="checkbox"/> Low-lying<br><input type="checkbox"/> previa<br><input type="checkbox"/> Multiple gestation<br><input type="checkbox"/> Small for GA | <input type="checkbox"/> Abnormal fluid<br><input type="checkbox"/> IUFD/Fetal demise<br><input type="checkbox"/> Gross anomaly<br><input type="checkbox"/> Risk of abortion<br><input type="checkbox"/> Large for GA<br><input type="checkbox"/> Pelvic Pathology<br><input type="checkbox"/> Others: _____ | <input type="checkbox"/> Referred<br><input type="checkbox"/> Managed in facility<br><input type="checkbox"/> Follow-up<br><input type="checkbox"/> No Action<br><input type="checkbox"/> Appointment given (date) _____<br><input type="checkbox"/> Follow-up call | <input type="checkbox"/> Unsure of findings<br><input type="checkbox"/> Due to Detected diagnosis<br><input type="checkbox"/> Facility limitation to handle<br><input type="checkbox"/> Patient Preference<br><input type="checkbox"/> Other reasons _____ | <input type="checkbox"/> Normal Vaginal Delivery<br><input type="checkbox"/> Caesarean section<br><input type="checkbox"/> Preterm/small baby<br><input type="checkbox"/> MVA<br><input type="checkbox"/> Fresh/Macerated still born<br><input type="checkbox"/> Confirm Diagnosis<br><input type="checkbox"/> Higher referral<br><input type="checkbox"/> Other _____ |
| <input type="checkbox"/> 1 <sup>st</sup> Trimester<br><input type="checkbox"/> 2 <sup>nd</sup> Trimester<br><input type="checkbox"/> 3 <sup>rd</sup> Trimester<br><input type="checkbox"/> Pelvic Scan<br><input type="checkbox"/> Others _____ | <input type="checkbox"/> Routine<br><input type="checkbox"/> High Risk pregnancy<br><input type="checkbox"/> Trauma /Emergency<br><input type="checkbox"/> Other: _____ | <input type="checkbox"/> Normal<br><input type="checkbox"/> Breech<br><input type="checkbox"/> Low-lying<br><input type="checkbox"/> previa<br><input type="checkbox"/> Multiple gestation<br><input type="checkbox"/> Small for GA | <input type="checkbox"/> Abnormal fluid<br><input type="checkbox"/> IUFD/Fetal demise<br><input type="checkbox"/> Gross anomaly<br><input type="checkbox"/> Risk of abortion<br><input type="checkbox"/> Large for GA<br><input type="checkbox"/> Pelvic Pathology<br><input type="checkbox"/> Others: _____ | <input type="checkbox"/> Referred<br><input type="checkbox"/> Managed in facility<br><input type="checkbox"/> Follow-up<br><input type="checkbox"/> No Action<br><input type="checkbox"/> Appointment given (date) _____<br><input type="checkbox"/> Follow-up call | <input type="checkbox"/> Unsure of findings<br><input type="checkbox"/> Due to Detected diagnosis<br><input type="checkbox"/> Facility limitation to handle<br><input type="checkbox"/> Patient Preference<br><input type="checkbox"/> Other reasons _____ | <input type="checkbox"/> Normal Vaginal Delivery<br><input type="checkbox"/> Caesarean section<br><input type="checkbox"/> Preterm/small baby<br><input type="checkbox"/> MVA<br><input type="checkbox"/> Fresh/Macerated still born<br><input type="checkbox"/> Confirm Diagnosis<br><input type="checkbox"/> Higher referral<br><input type="checkbox"/> Other _____ |
| <input type="checkbox"/> 1 <sup>st</sup> Trimester<br><input type="checkbox"/> 2 <sup>nd</sup> Trimester<br><input type="checkbox"/> 3 <sup>rd</sup> Trimester<br><input type="checkbox"/> Pelvic Scan<br><input type="checkbox"/> Others _____ | <input type="checkbox"/> Routine<br><input type="checkbox"/> High Risk pregnancy<br><input type="checkbox"/> Trauma /Emergency<br><input type="checkbox"/> Other: _____ | <input type="checkbox"/> Normal<br><input type="checkbox"/> Breech<br><input type="checkbox"/> Low-lying<br><input type="checkbox"/> previa<br><input type="checkbox"/> Multiple gestation<br><input type="checkbox"/> Small for GA | <input type="checkbox"/> Abnormal fluid<br><input type="checkbox"/> IUFD/Fetal demise<br><input type="checkbox"/> Gross anomaly<br><input type="checkbox"/> Risk of abortion<br><input type="checkbox"/> Large for GA<br><input type="checkbox"/> Pelvic Pathology<br><input type="checkbox"/> Others: _____ | <input type="checkbox"/> Referred<br><input type="checkbox"/> Managed in facility<br><input type="checkbox"/> Follow-up<br><input type="checkbox"/> No Action<br><input type="checkbox"/> Appointment given (date) _____<br><input type="checkbox"/> Follow-up call | <input type="checkbox"/> Unsure of findings<br><input type="checkbox"/> Due to Detected diagnosis<br><input type="checkbox"/> Facility limitation to handle<br><input type="checkbox"/> Patient Preference<br><input type="checkbox"/> Other reasons _____ | <input type="checkbox"/> Normal Vaginal Delivery<br><input type="checkbox"/> Caesarean section<br><input type="checkbox"/> Preterm/small baby<br><input type="checkbox"/> MVA<br><input type="checkbox"/> Fresh/Macerated still born<br><input type="checkbox"/> Confirm Diagnosis<br><input type="checkbox"/> Higher referral<br><input type="checkbox"/> Other _____ |
